# Supplementary figures and images for: BENviewer: a gene interaction network visualization server based on graph embedding model
Source: Oxford University Press journal article supplement (doi:10.1093/database/baab033), 2021-05-01

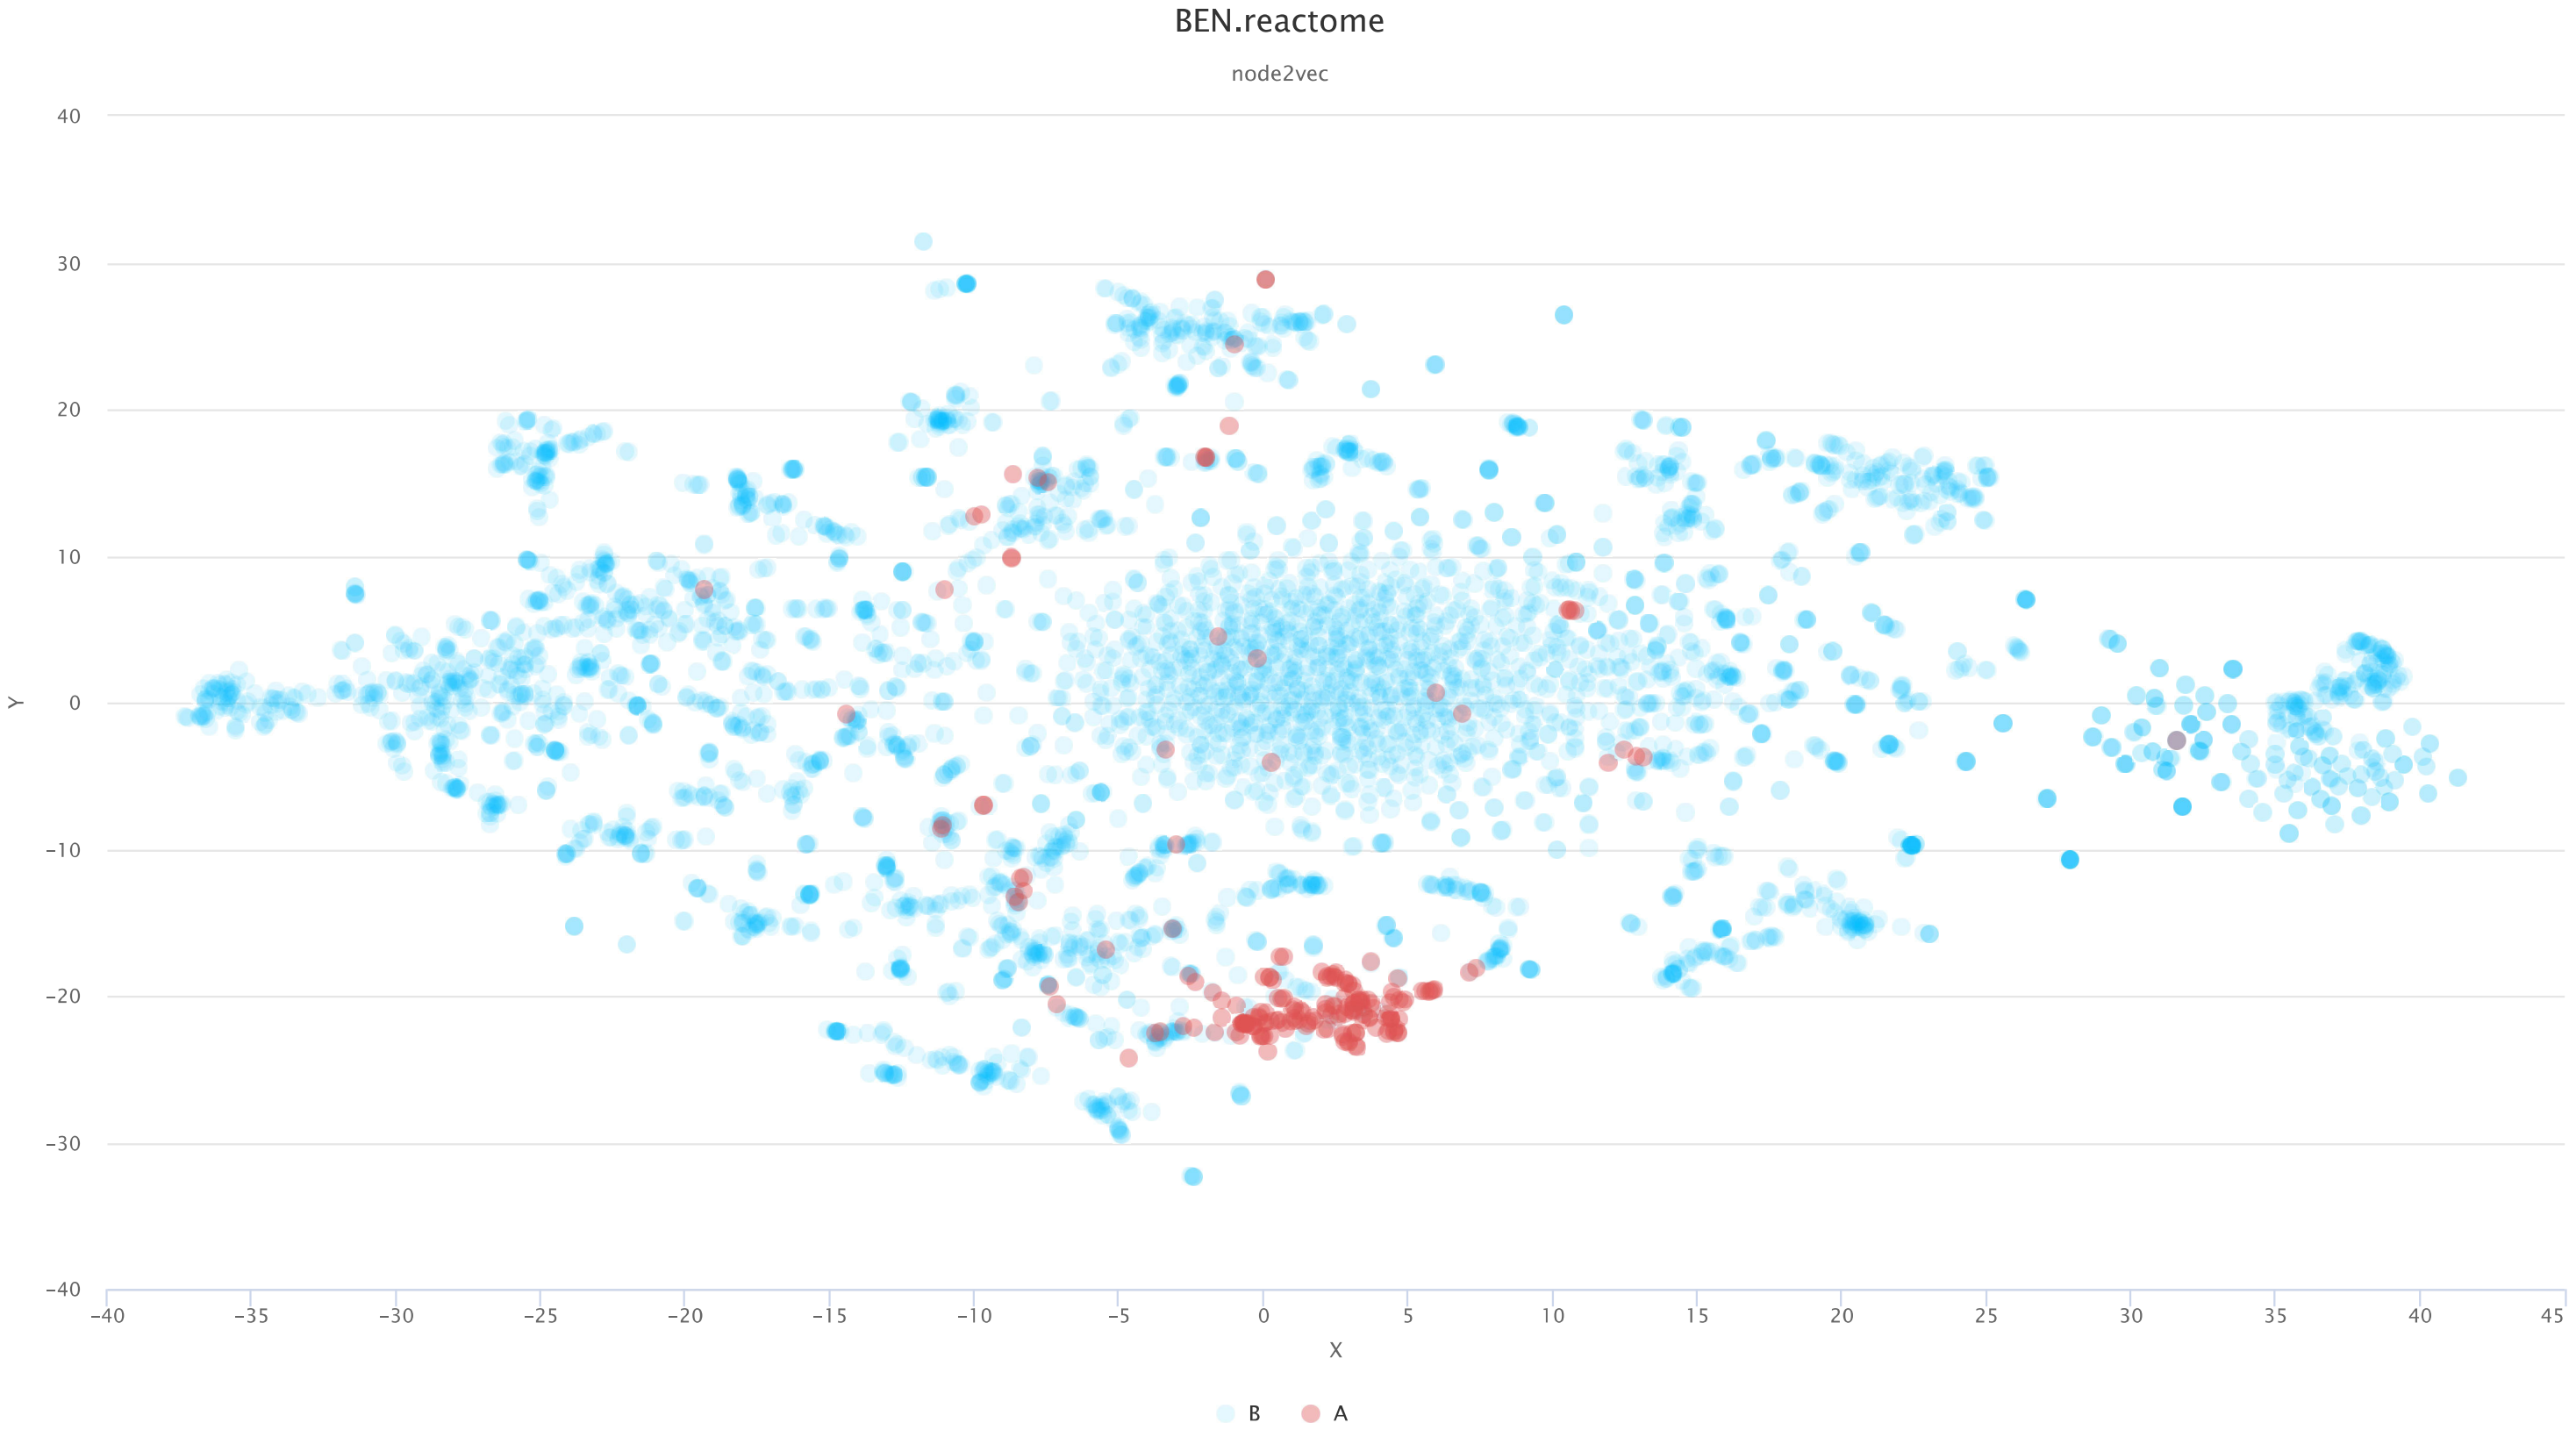

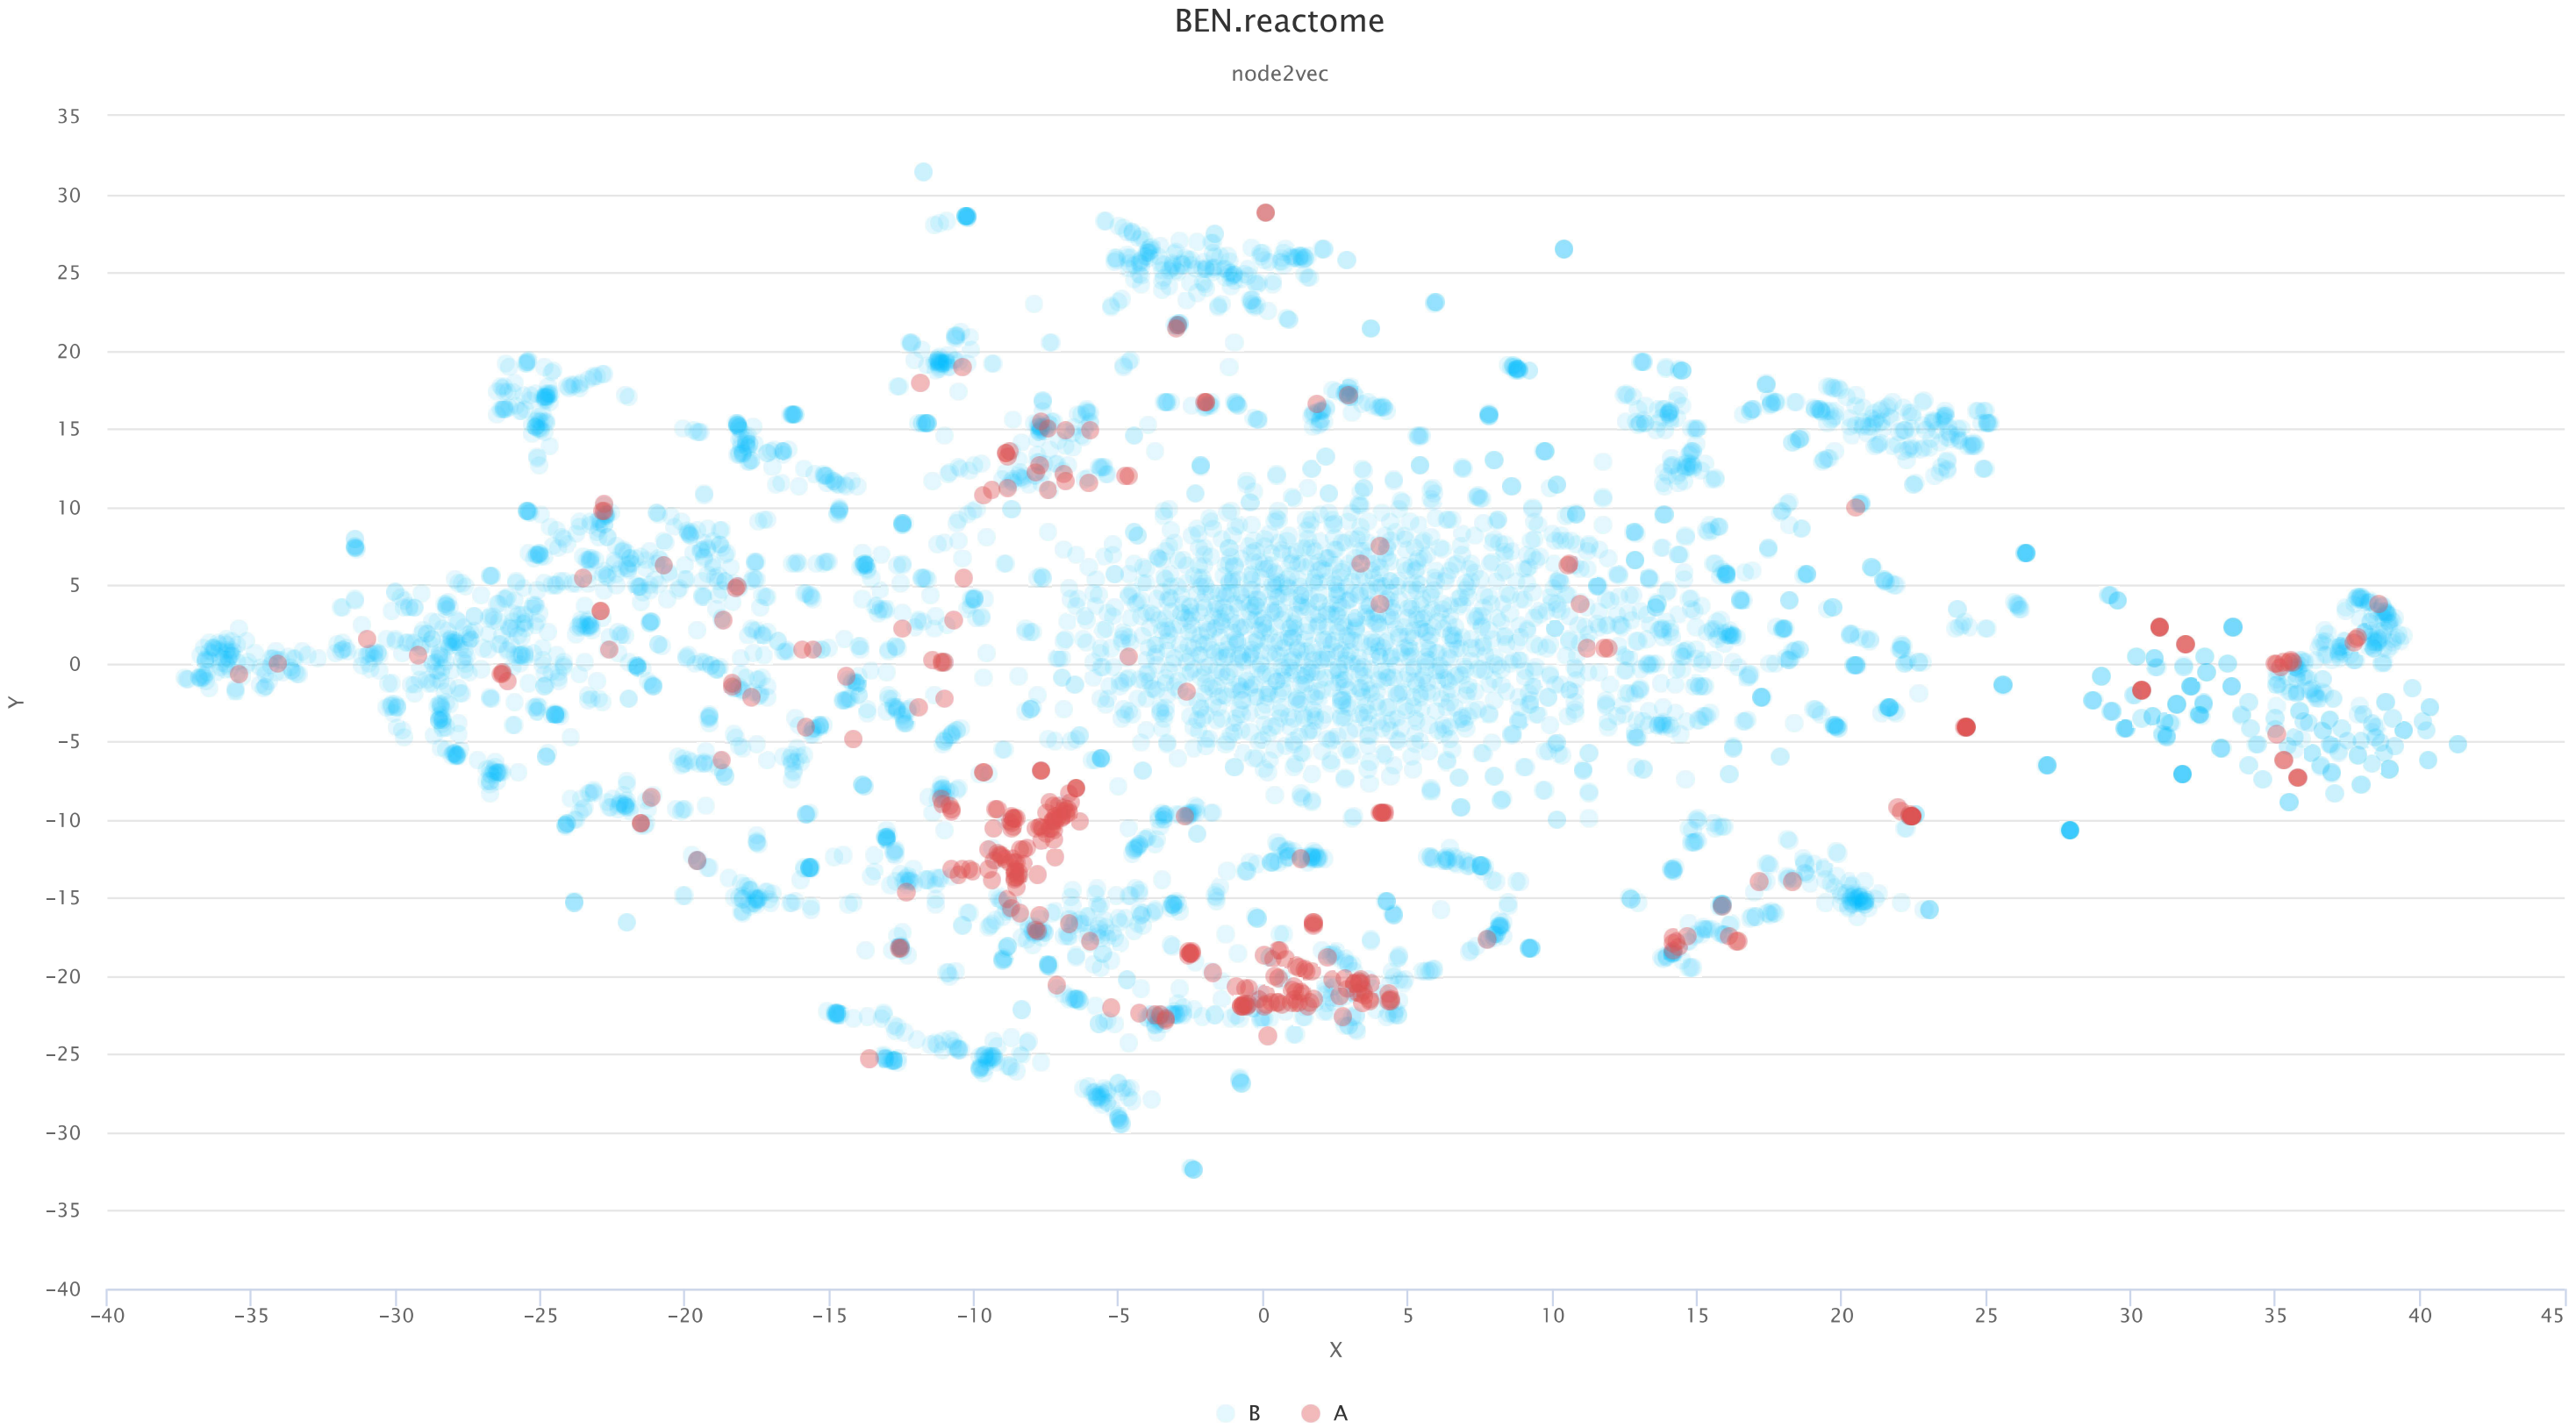

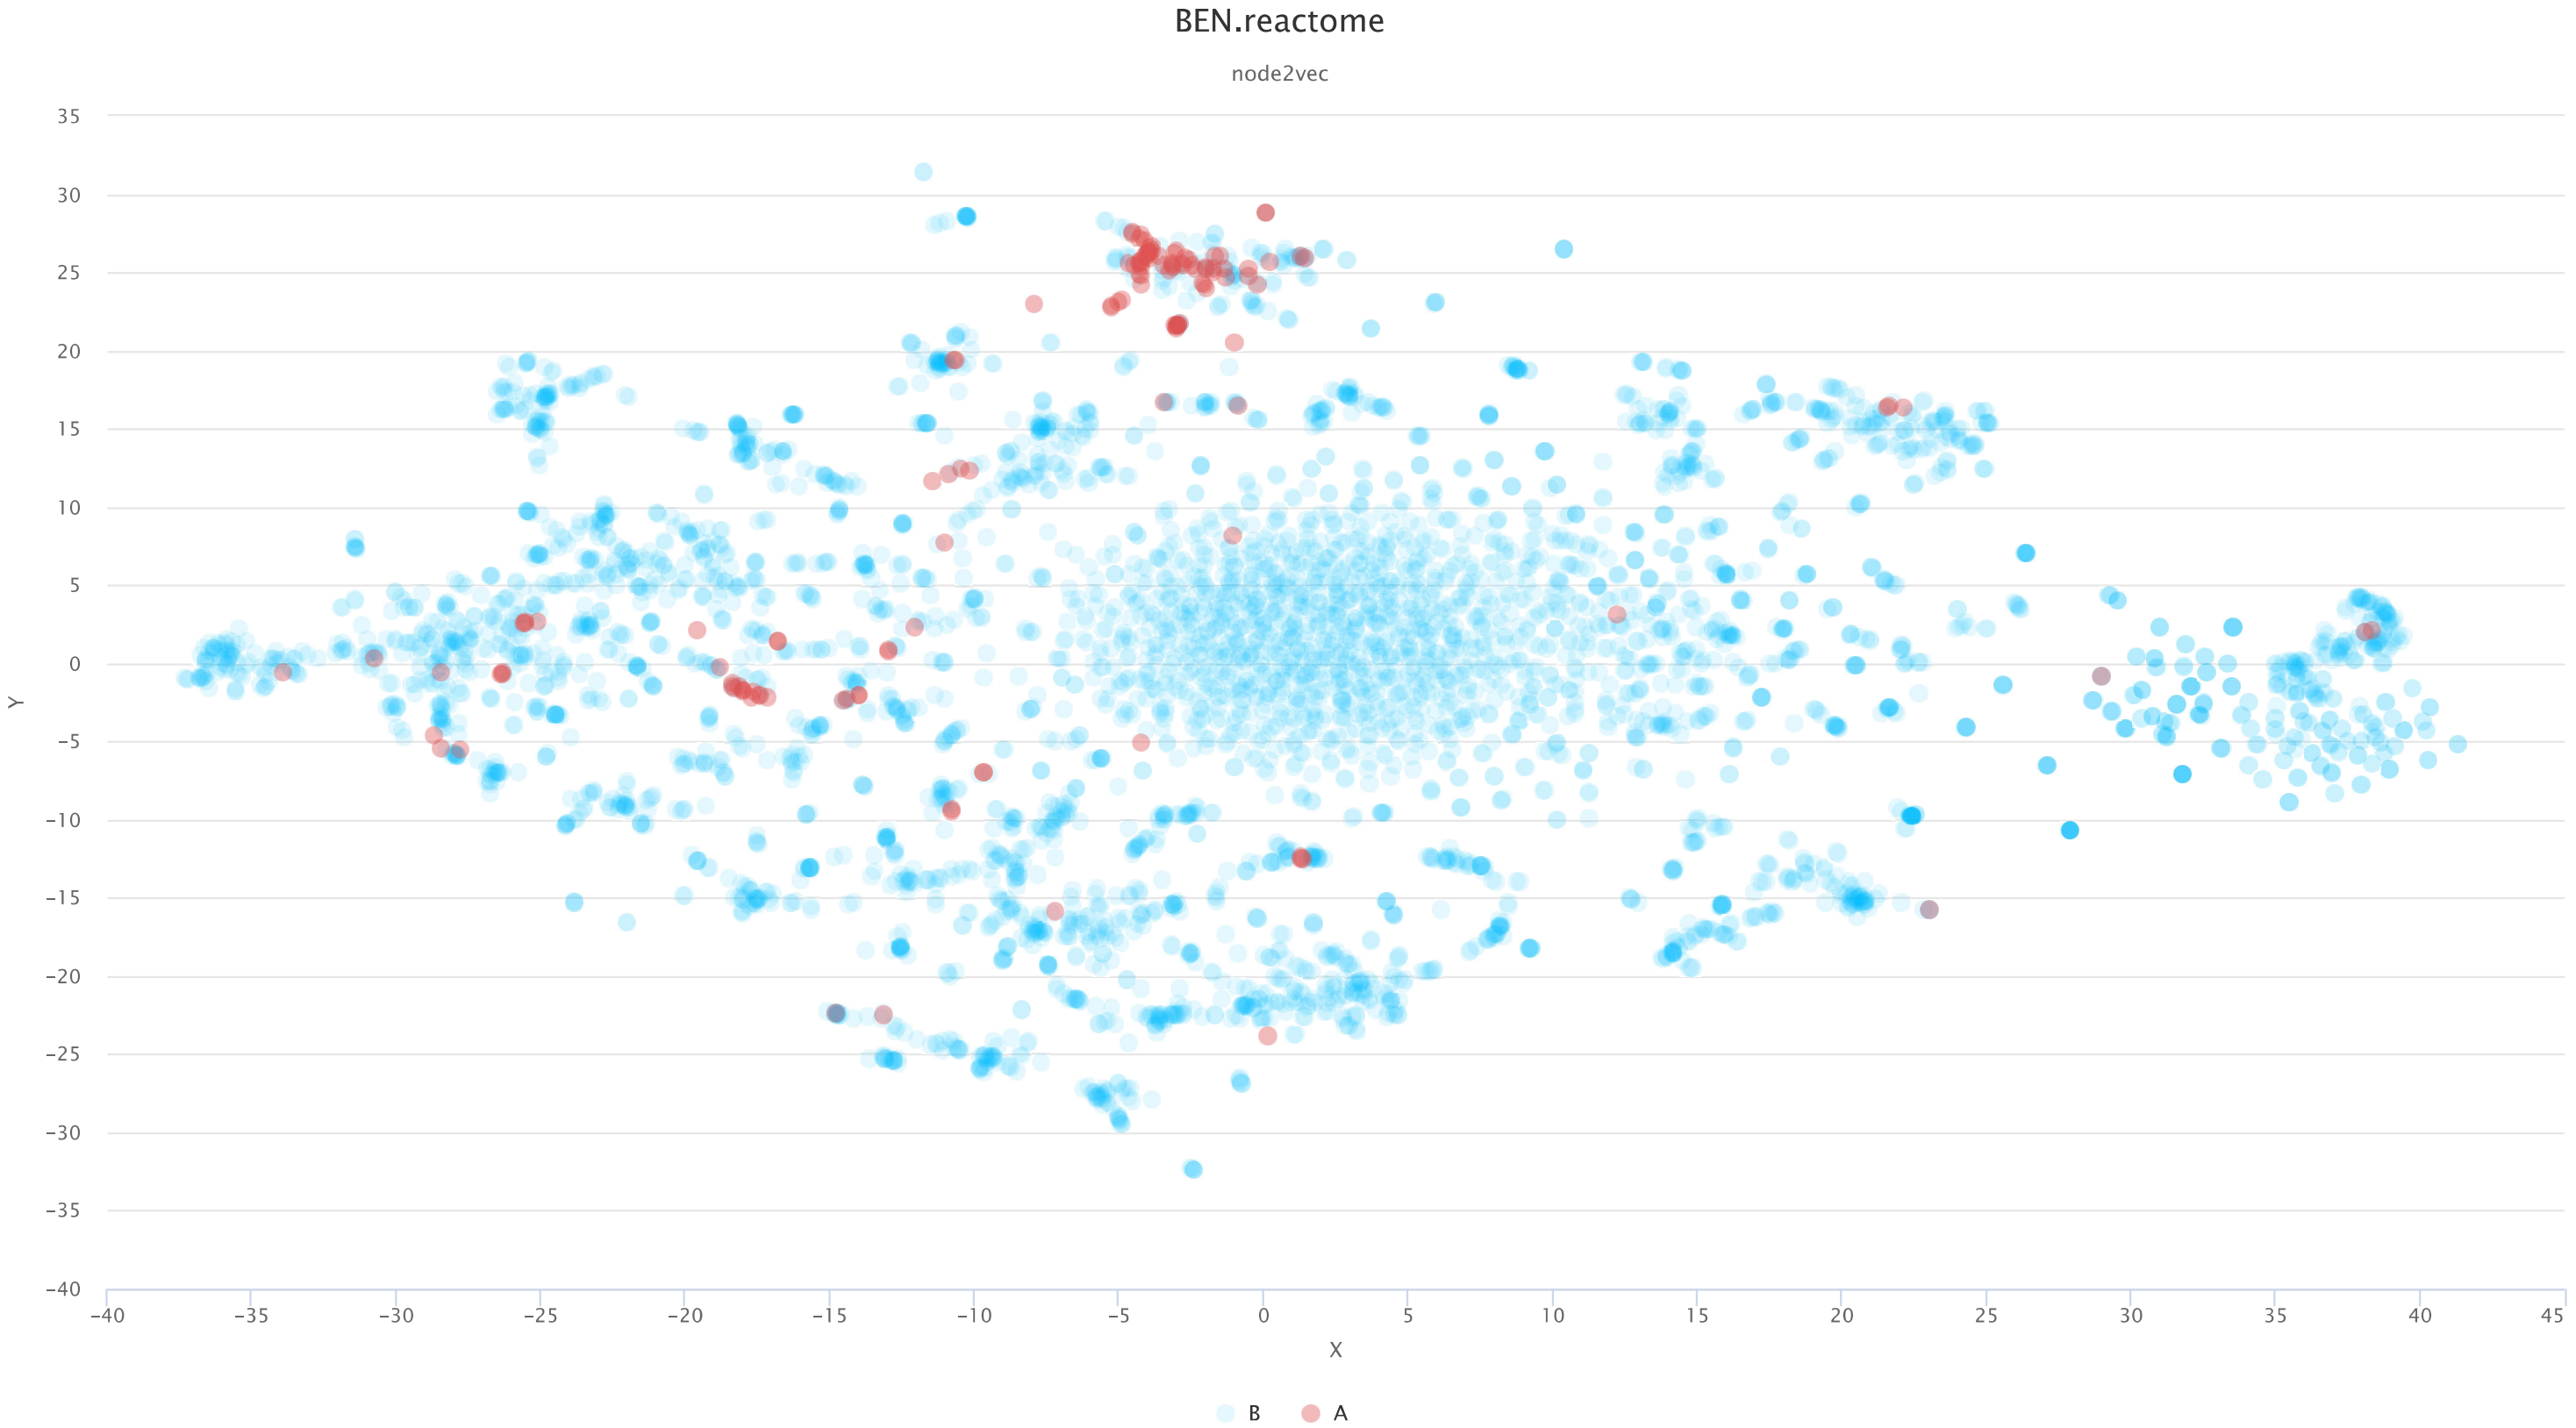



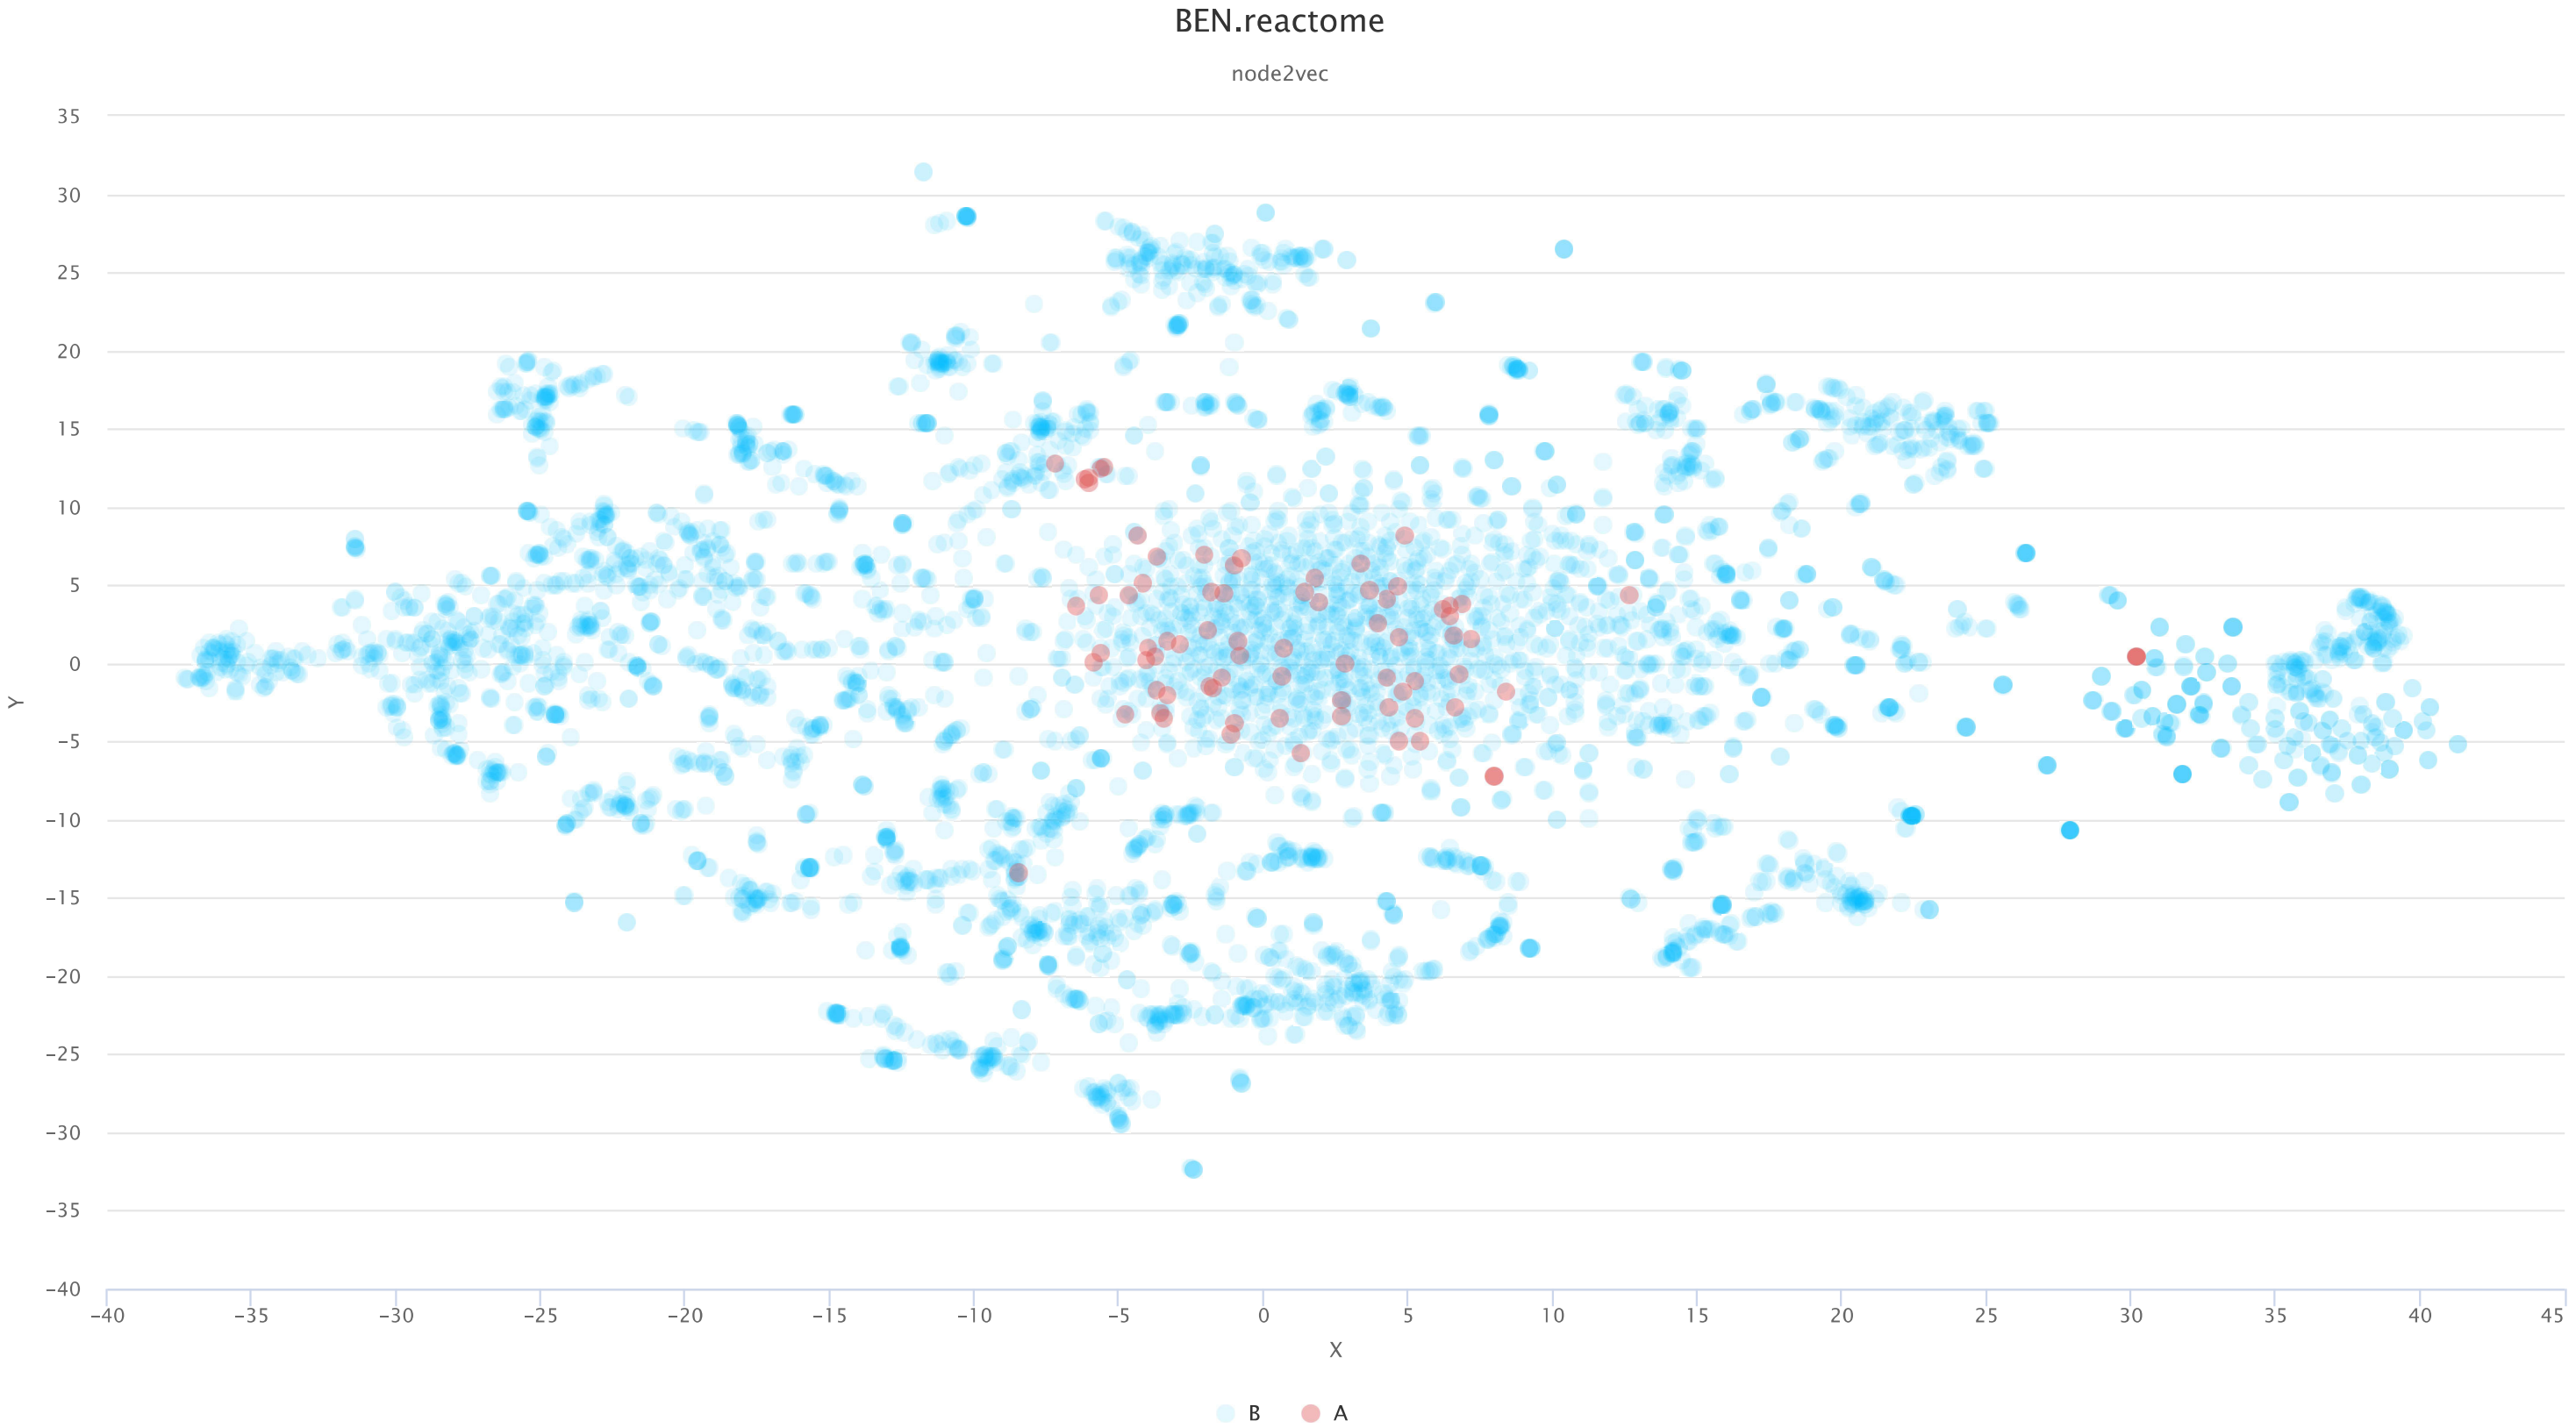



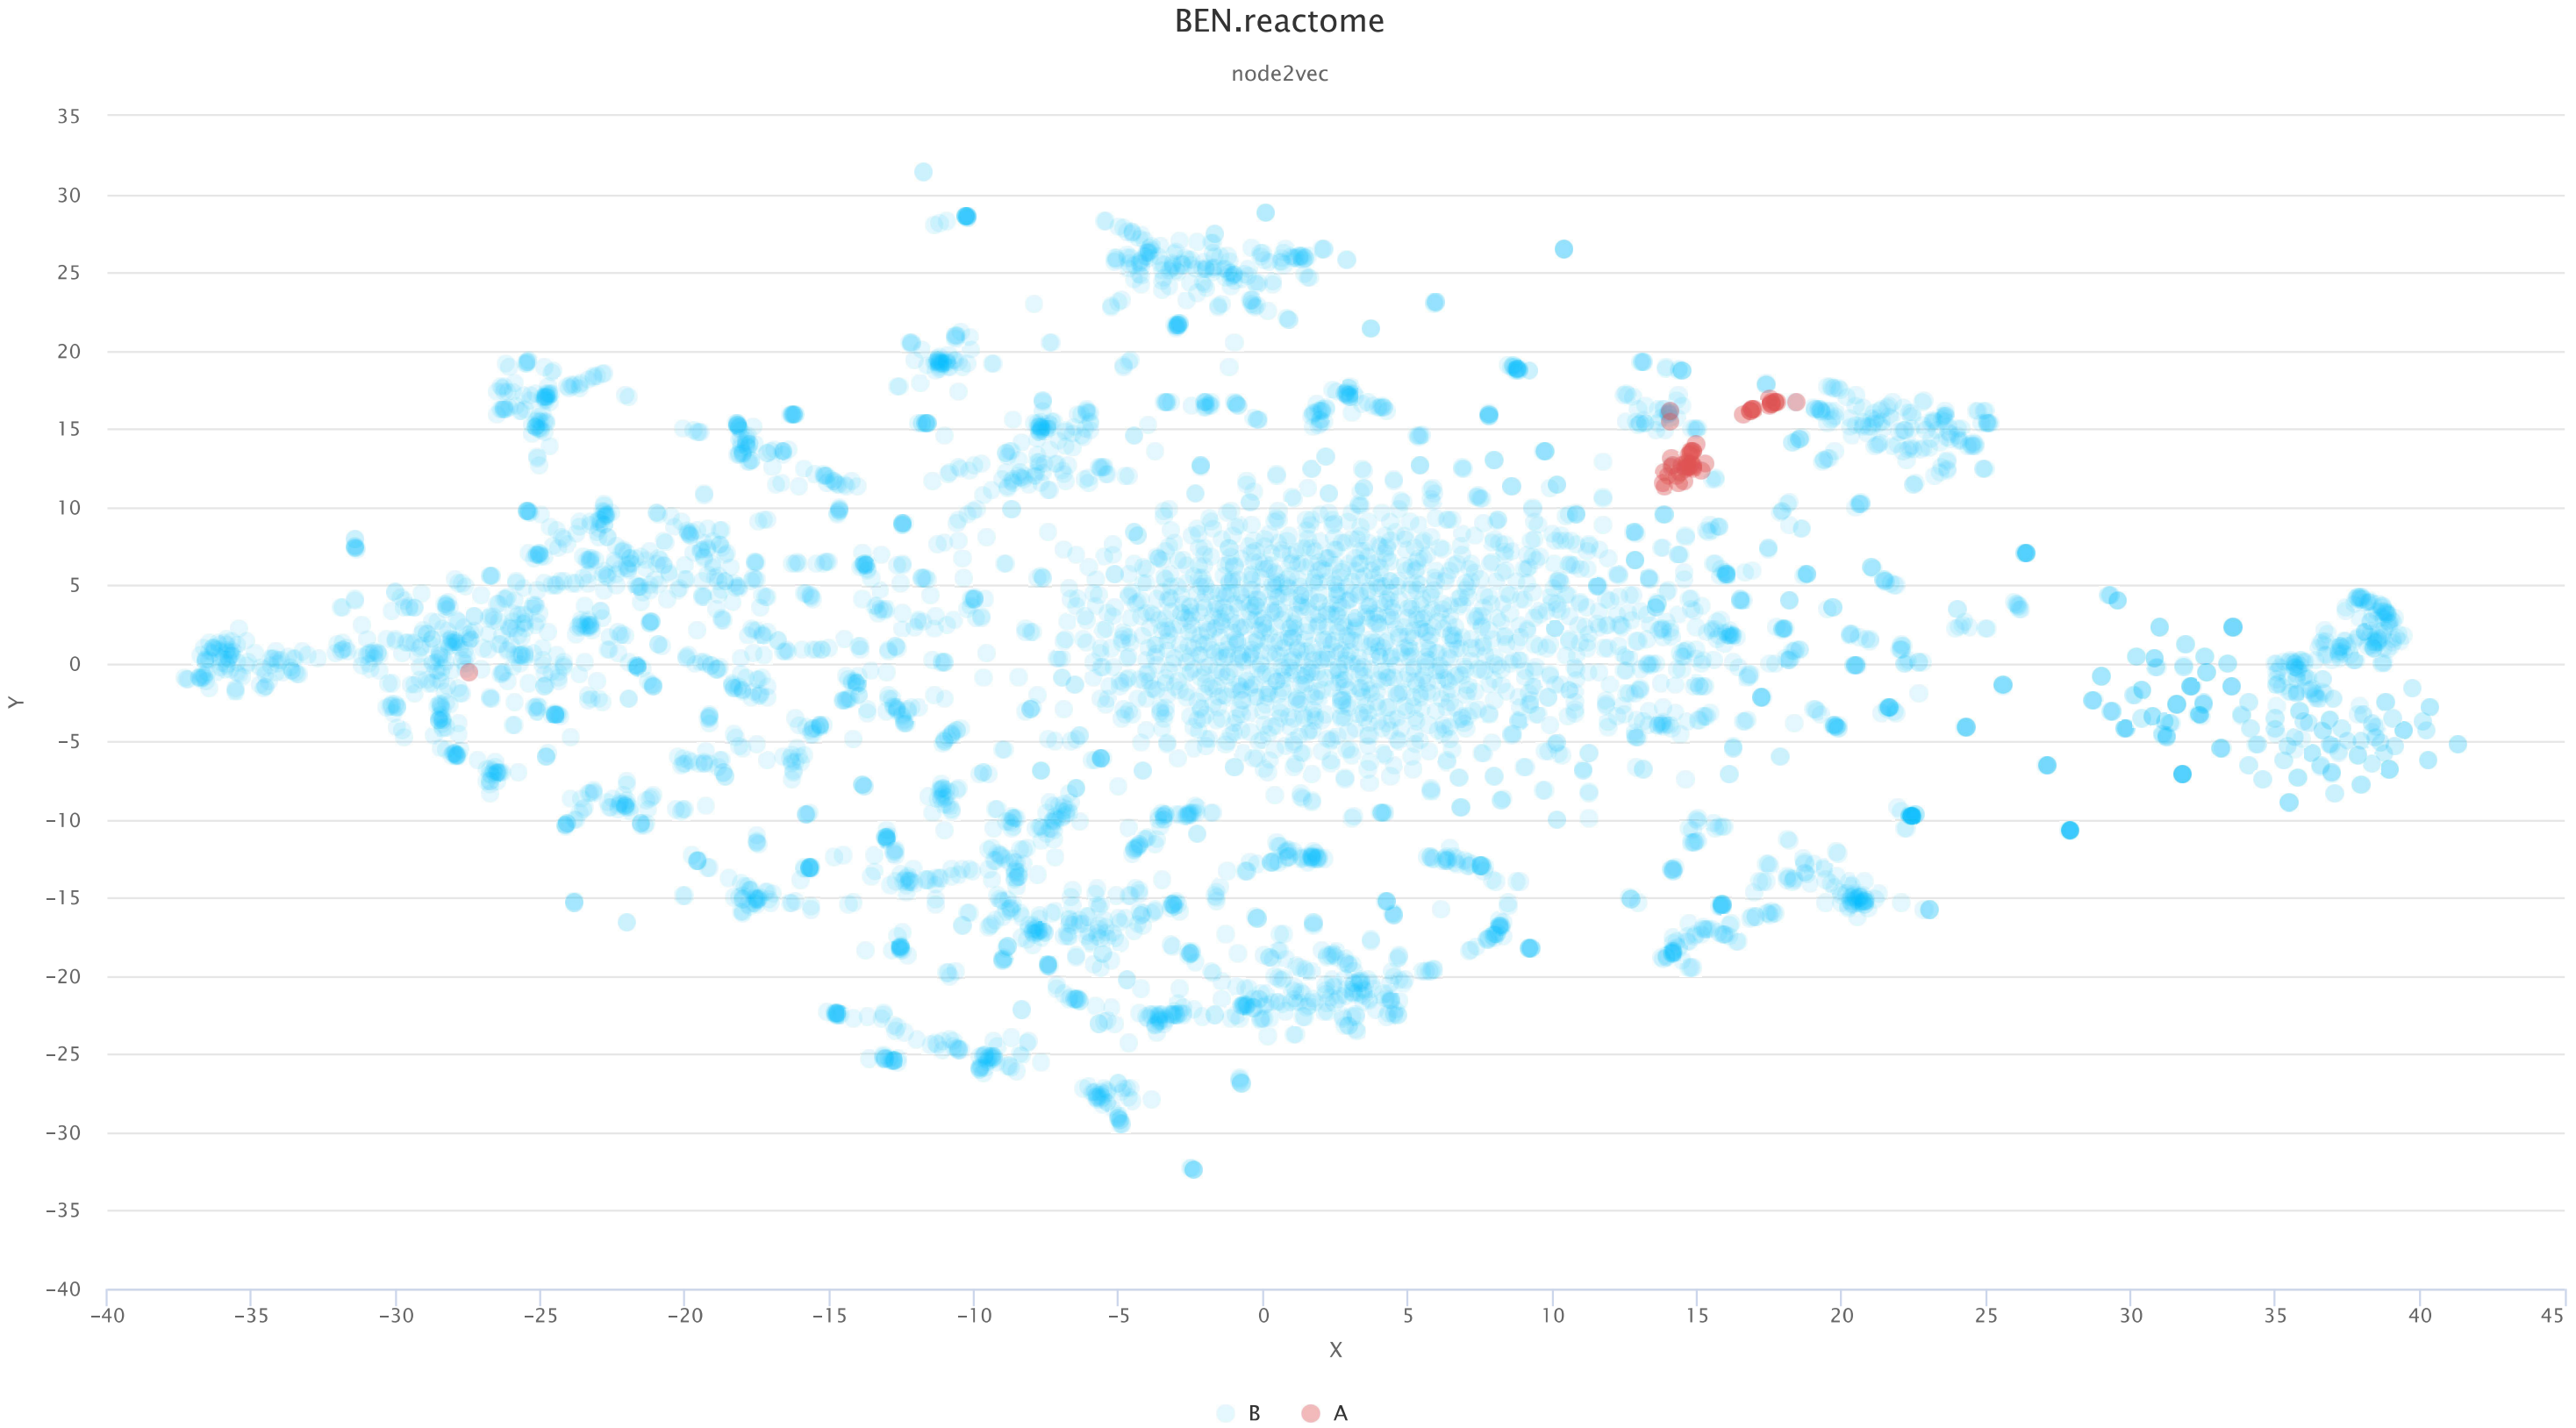

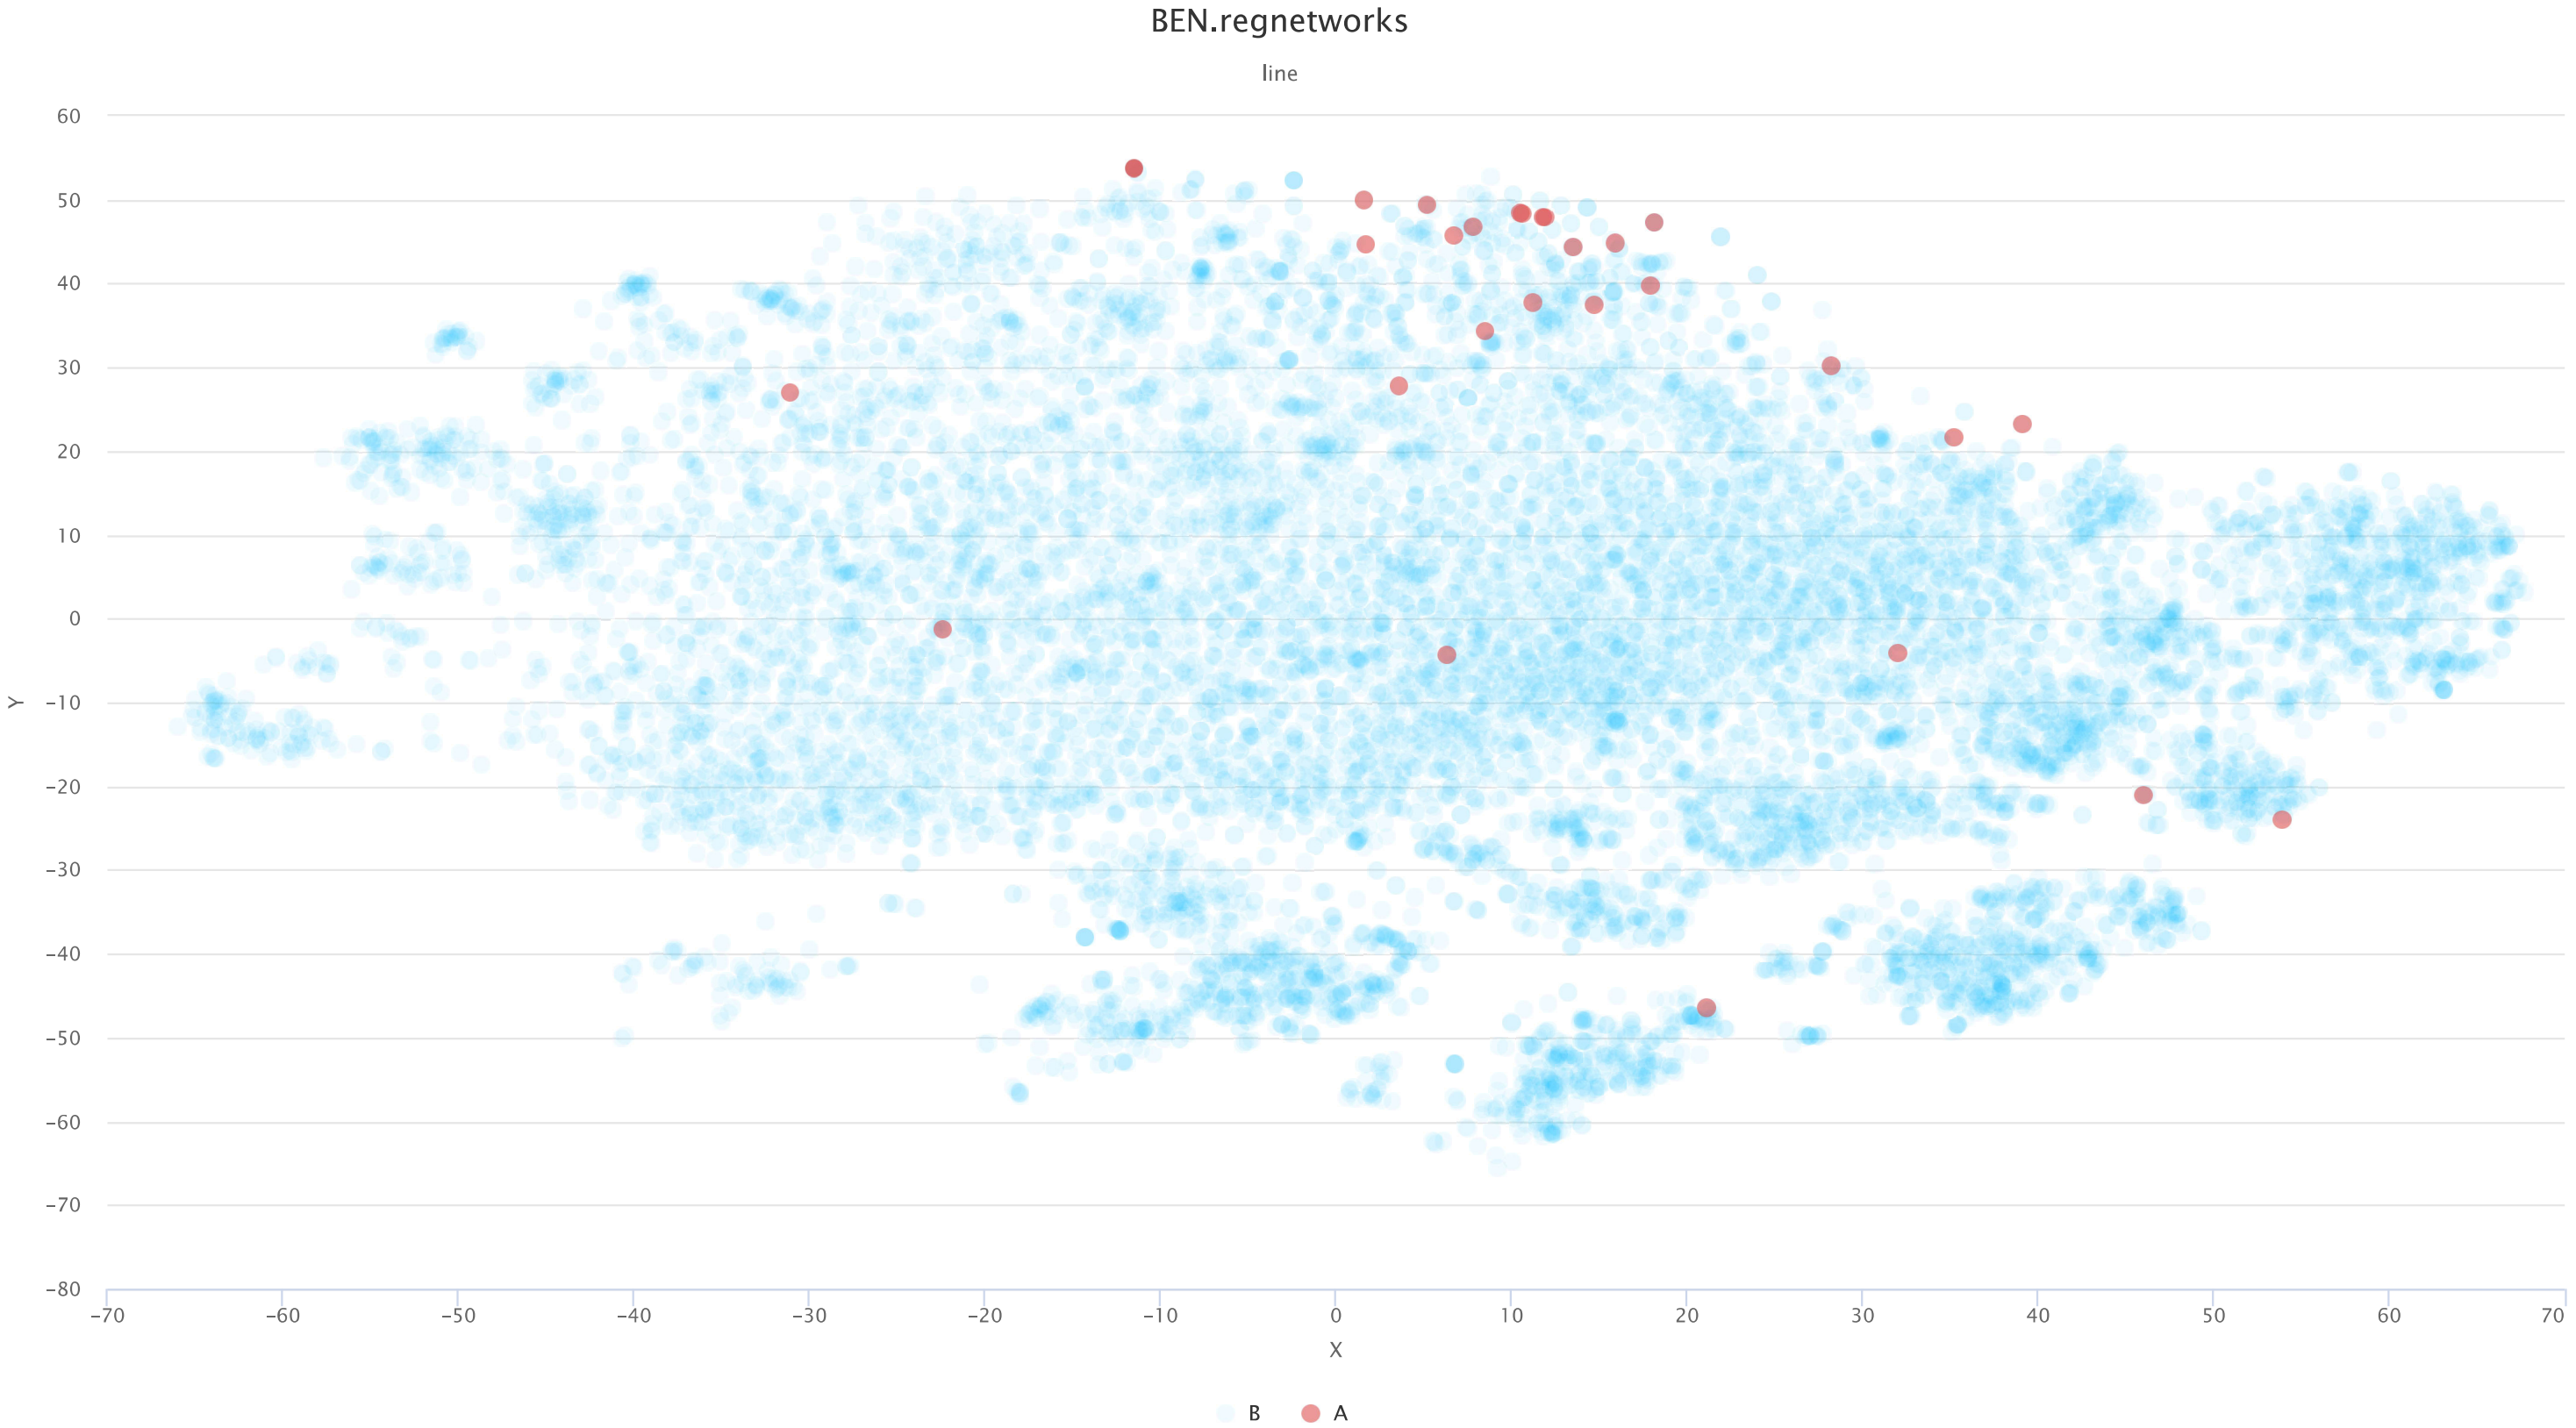



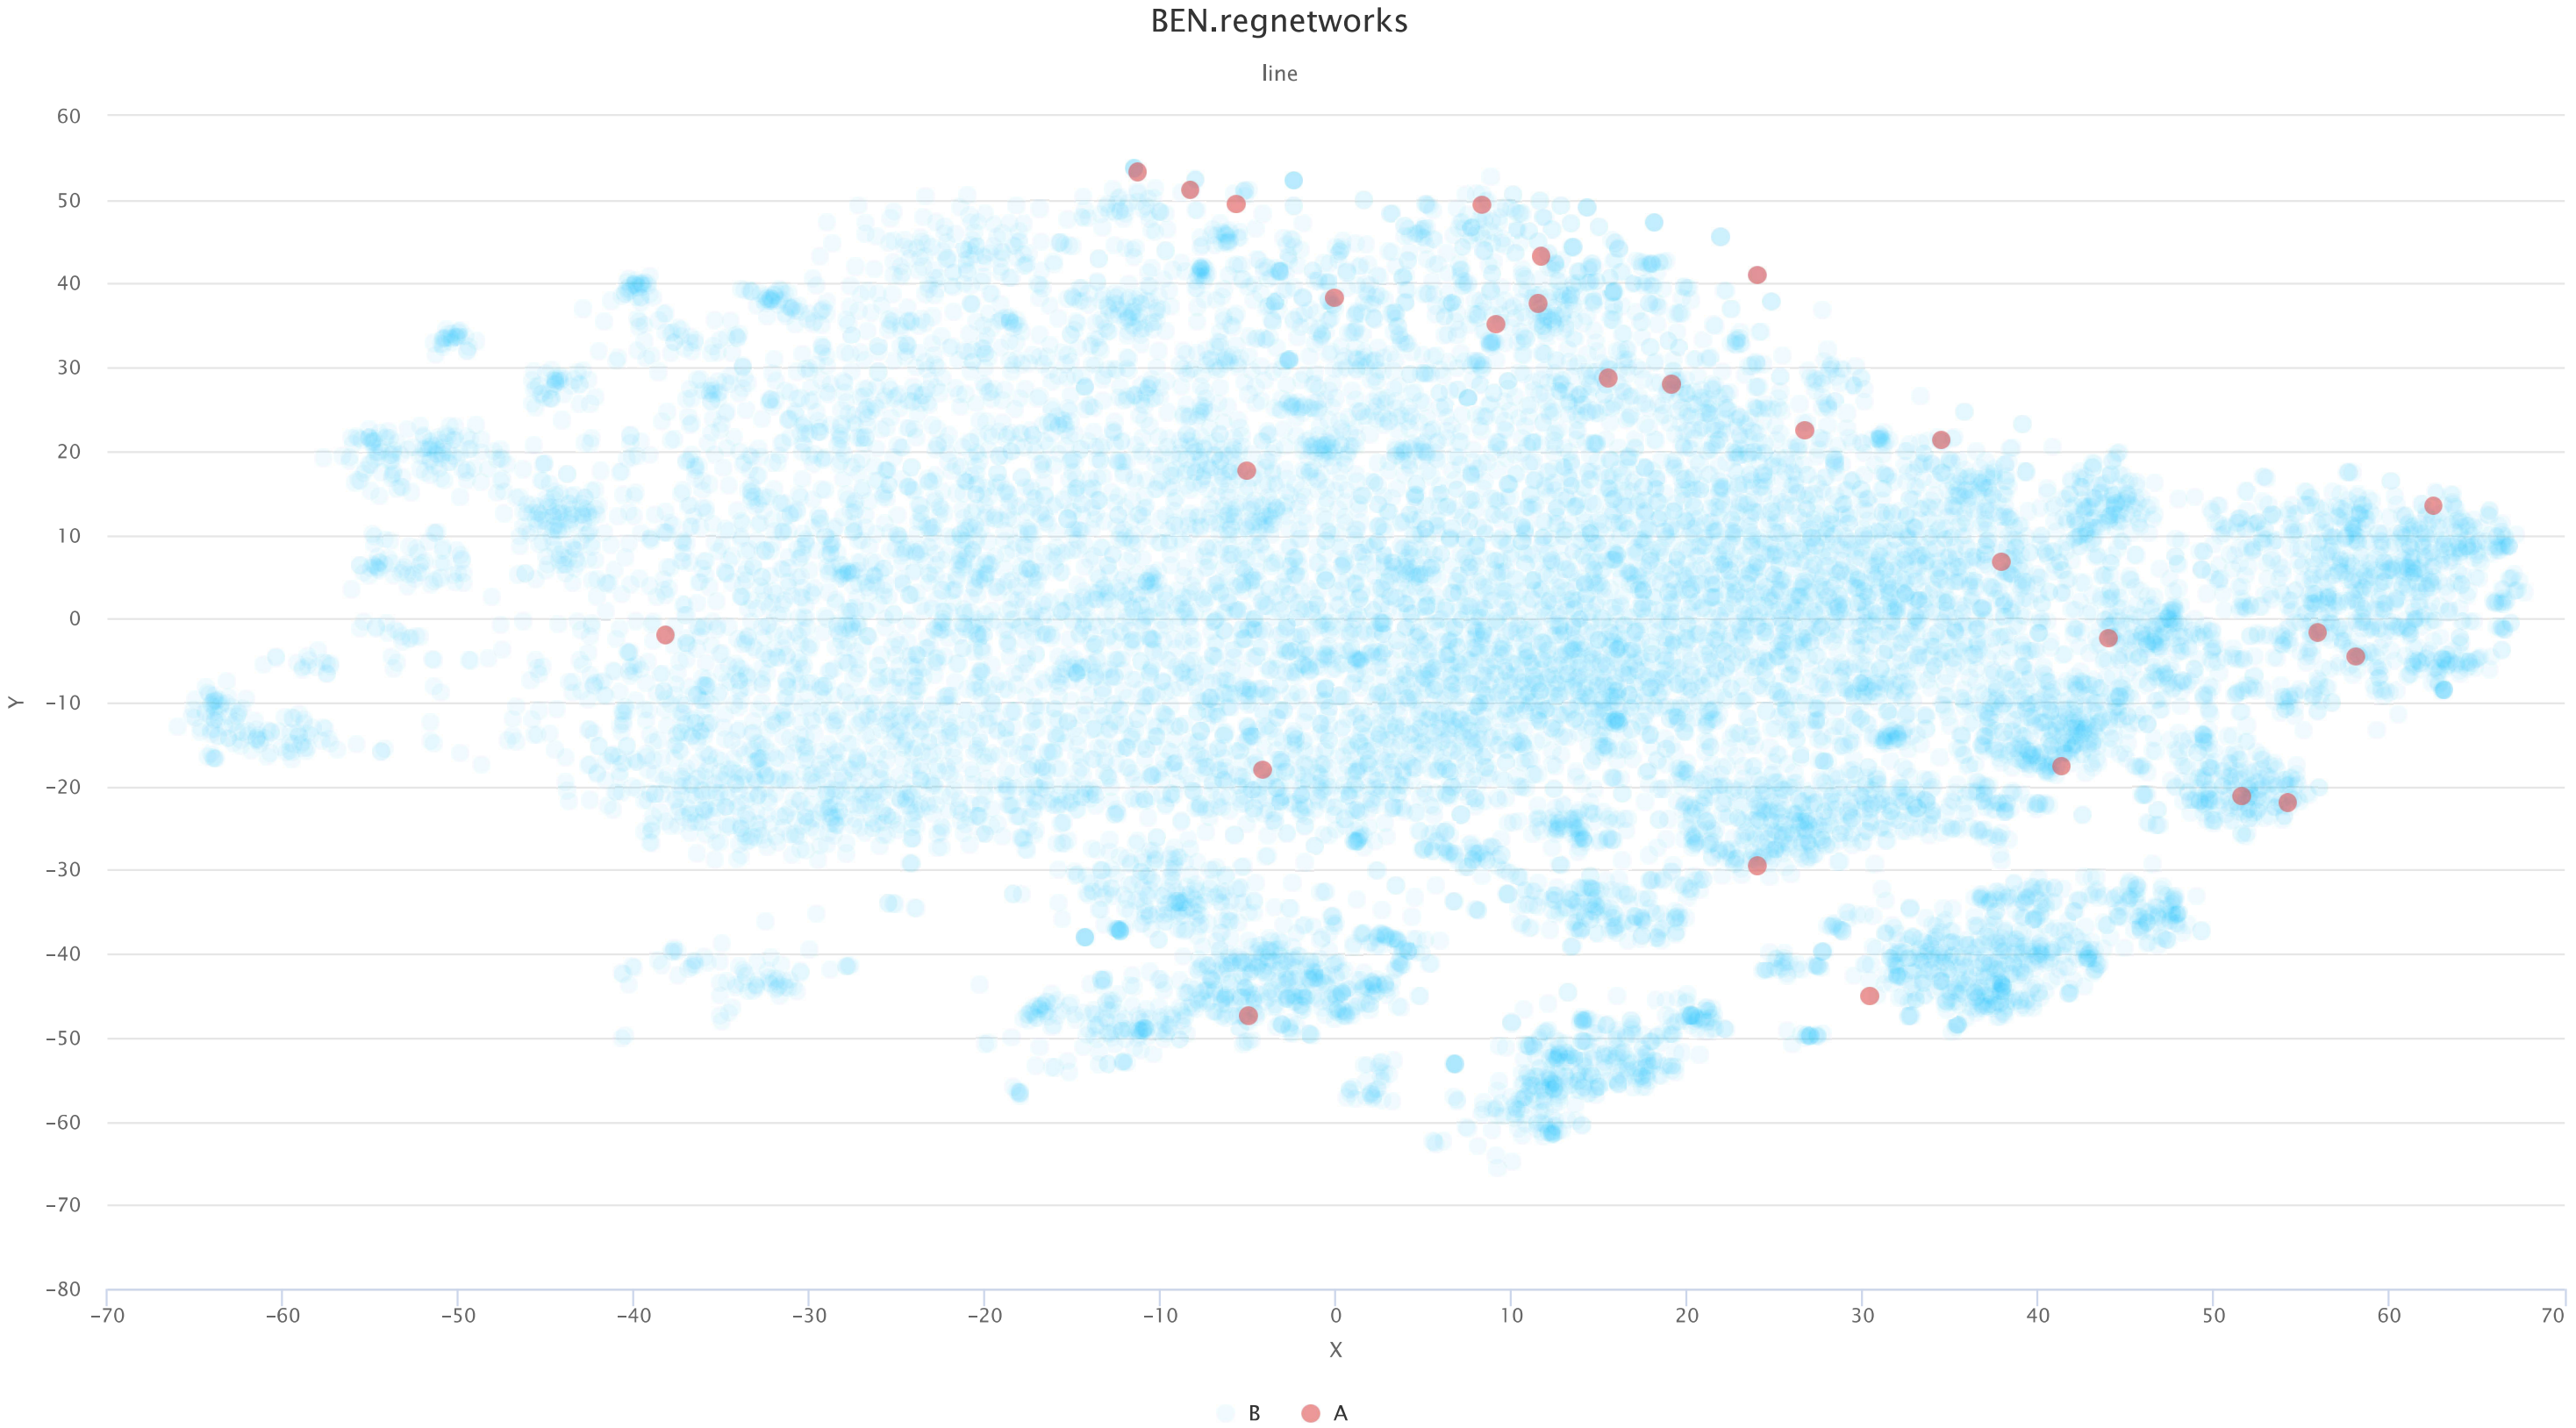

Supplement: baab033_supp.zip [file baab033_supp.zip]
